# Supplementary material for: Conversion of biomass-derived ethyl levulinate into γ-valerolactone via hydrogen transfer from supercritical ethanol over a ZrO2 catalyst
Source: Royal Society of Chemistry journal article supplement (doi:10.1039/c3ra41288a), 2013-01-01
Supplement: c3ra41288a.pdf [file c3ra41288a.pdf]

## Electronic Supplementary Information

### Conversion of Biomass-derived Ethyl Levulinate into $\gamma$ -Valerolactone via Hydrogen Transfer from Supercritical Ethanol over $\text{ZrO}_2$ Catalyst

Xing Tang, Lei Hu, Yong Sun\*, Geng Zhao, Weiwei Hao, and Lu Lin\*

*School of Energy Research, Xiamen University, Xiamen, China*

**Table S1** Conversion of EL into GVL in various alcohol solvents <sup>a</sup>

| Entry | Solvent     | Pressure <sup>b</sup><br>(bar) | GVL<br>yield<br>(%) | EL<br>conversion<br>(%) | Other<br>levulinates<br>(%) |
|-------|-------------|--------------------------------|---------------------|-------------------------|-----------------------------|
| 1     | methanol    | 98                             | 14.9                | 72.3                    | 39.9 (ML) <sup>b</sup>      |
| 2     | ethanol     | 70                             | 62.5                | 81.5                    |                             |
| 3     | isopropanol | 64                             | 93.4                | 97.2                    | IPL <sup>c</sup>            |
| 4     | 1-butanol   | 26                             | 84.4                | 95.5                    | 2.9 (BL) <sup>d</sup>       |

<sup>a</sup> Reaction conditions: EL, 2 g;  $\text{ZrO}_2$ -573 catalyst, 1 g; alcohol, 38 g; reaction time, 1 h; reaction temperature, 523 K. <sup>b</sup> ML means methyl levulinate. <sup>c</sup> IPL means isopropyl levulinate, a very small quantity of IPL was detected. <sup>d</sup> BL means butyl levulinate.

**Table S2** The specific surface area of  $\text{ZrO}_2$ -573 before reaction and after multiple reactions

| Cycle                     | $S_{\text{BET}}^a$<br>( $\text{m}^2\text{g}^{-1}$ ) |
|---------------------------|-----------------------------------------------------|
| fresh                     | 157.2                                               |
| 1                         | 126.9                                               |
| 4                         | 129.1                                               |
| regeneration <sup>b</sup> | 130.7                                               |

<sup>a</sup> Determined by BET analysis of  $\text{N}_2$  adsorption isotherms. <sup>b</sup>  $\text{ZrO}_2$ -573 calcination at 573 K for 4 h after cycle 4.

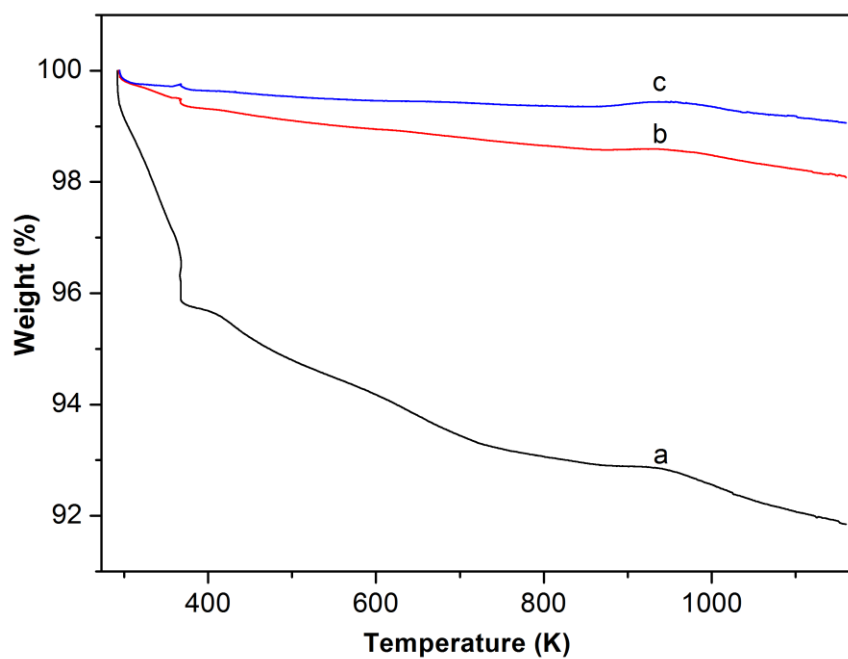

**Fig. S1** TGA profiles for (a) ZrO<sub>2</sub>-573, (b) ZrO<sub>2</sub>-773 and (c) ZrO<sub>2</sub>-973.

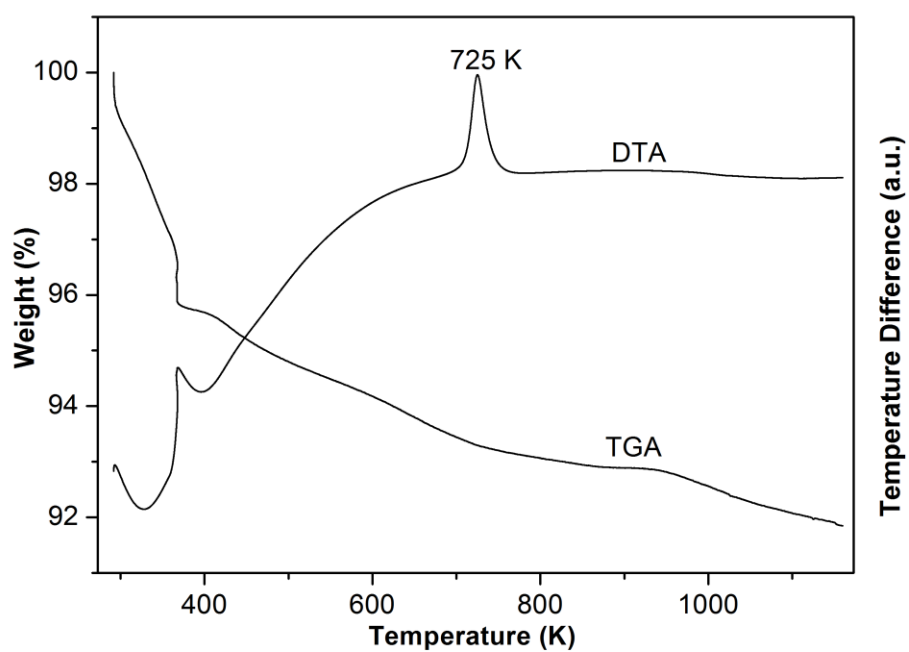

**Fig. S2** TGA and DTA curves of the ZrO<sub>2</sub>-573 catalyst.

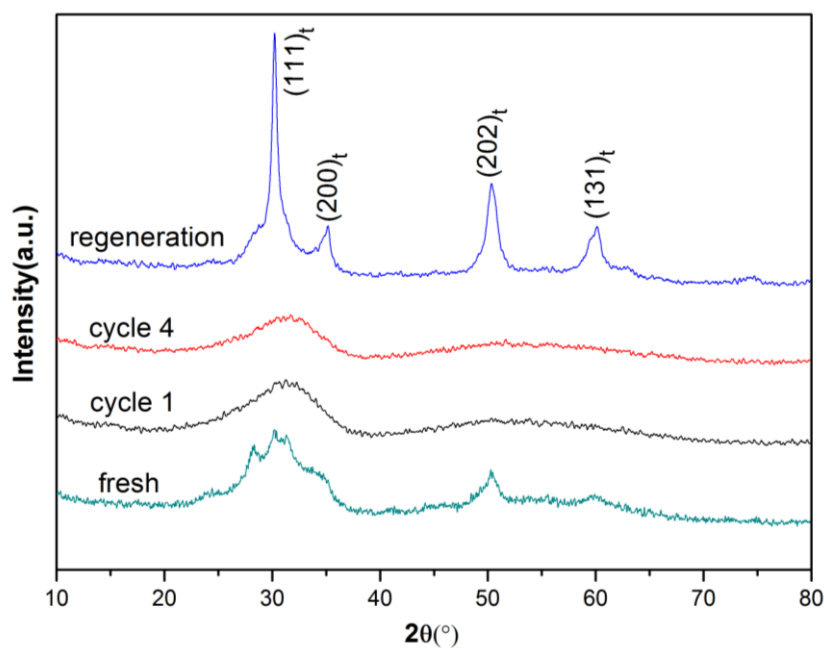

**Fig. S3** X-Ray diffraction (XRD) patterns for ZrO<sub>2</sub>-573 before and after reaction. Catalyst was regenerated at 573 K for 4 h.

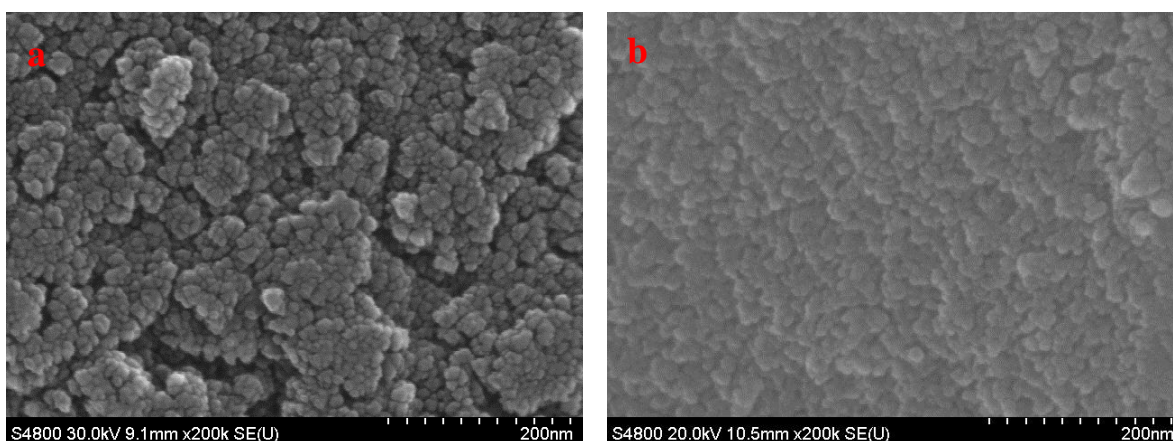

**Fig. S4** SEM images for ZrO<sub>2</sub>-573 after cycle 4 (a) and regeneration (b).

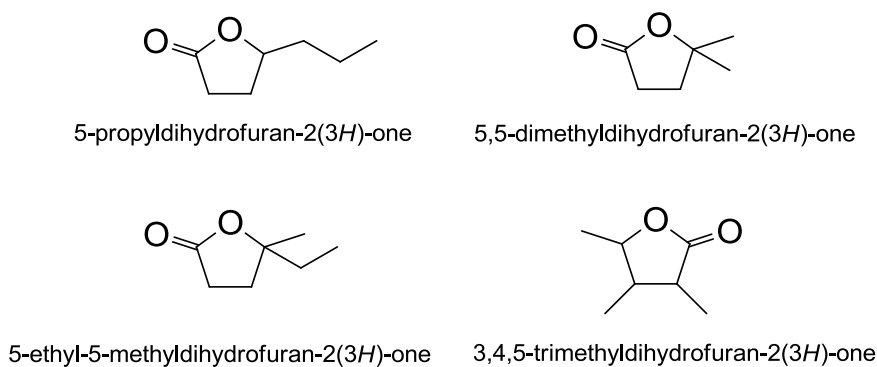

**Scheme S1** By-products derived from GVL were detected by GC-MS analysis.
